# Supplementary material for: Aryl hydrocarbon receptor signaling regulates NF-κB RelB activation during dendritic-cell differentiation
Source: PubMed Central journal article supplement — Immunol Cell Biol. 2013 Sep 3;91(9):568–75. doi: 10.1038/icb.2013.43 (PMC3806313; doi:10.1038/icb.2013.43), 2013-09-03
Supplement: icb201343x1.pdf [file icb201343x1.pdf]

### Supplemental Table 1

Primer used to amplify mRNAs via quantitative real-time PCR encoding mouse rps13 as housekeeping gene and DC-specific chemokines, cytokines, and receptors based on published GenBank sequences for mouse.

| <b>Gene</b>                   | <b>Forward primer (5'–3')</b> | <b>Reverse primer (5'–3')</b> |
|-------------------------------|-------------------------------|-------------------------------|
| <i>Rps13</i>                  | gtccgaaagcaccttgagag          | agcagaggctgtggatgact          |
| <i>C3aR1</i>                  | tgacagggtcagctccttct          | cattaggaggctttccacca          |
| <i>CCR3</i>                   | tttctgcagtcctcgctat           | ataagacggatggccttggtg         |
| <i>CXCL2</i>                  | aagtttgcttgaccctgaa           | aggcacatcaggtacgatcc          |
| <i>CXCL3</i>                  | caacgggtgtctggatgtgc          | agccaaggaataactgcctca         |
| <i>IL-6</i>                   | ccggagaggagacttcacag          | ggaaattgggtaggaagga           |
| <i>IL-10</i>                  | ccaagccttatcgaaatga           | ttttcacaggggagaaatcg          |
| <i>IL-12A</i>                 | catcgatgagctgatgcagt          | cagatagcccatcacctgt           |
| <i>IL-22</i>                  | tttctgaccaaactcagca           | tctggatgttctggctgtca          |
| <i>IL-23</i>                  | gactcagccaactcctccag          | ggcactaagggctcagtcag          |
| <i>CCR6</i>                   | tggttcgccactctaactcagt        | tctggtgtagaaaggggaagtgg       |
| <i>CD80</i>                   | ttcgtctttcacaagtgcttca        | tgccagtagattcggcttca          |
| <i>CD86</i>                   | gaagccgaatcagccttagc          | cagcgttactatcccgtct           |
| <i>DC-CK1</i>                 | ttaggaccccatgacgactc          | caggactcgttccagcaaga          |
| <i>IDO1</i>                   | ggctagaaatctgcctgtgc          | agagctcgtagtaggaaca           |
| <i>IDO2</i>                   | gctatcaccatgggattcgt          | agagatcttggcagcacctt          |
| <i>RelB</i>                   | tccaggctttcttgcactt           | aagctgagtgaggagacagga         |
| <i>SRA1</i>                   | ctggacaaactgggtccacct         | tccccttctctccctttgt           |
| <i>TNF<math>\alpha</math></i> | atgagcacagaaagcatgatccgc      | ccaaagtagacctgcccggactc       |
